# Supplementary material for: Silver nanoclusters functionalized by chromotropic acid and layered double hydroxides for the turn-on detection of melamine
Source: Royal Society of Chemistry journal article supplement (doi:10.1039/c6tc01264g), 2016-01-01
Supplement: c6tc01264g1.pdf [file c6tc01264g1.pdf]

**Supporting Information for**

**Silver nanoclusters functionalized by chromotropic acid and  
layered double hydroxides for turn-on detection of  
melamine**

He Re Mingzhe Li Yanyan Fu and Lan Jin\*

*State Key Laboratory of Chemical Resource Engineering, Beijing University of  
Chemical Technology, Beijing 100029, China*

\* Corresponding author. Tel: +86-10-64412131; Fax: +86-10-64425385.

E-mail address: [jinlan@mail.buct.edu.cn](mailto:jinlan@mail.buct.edu.cn) (Lan Jin).

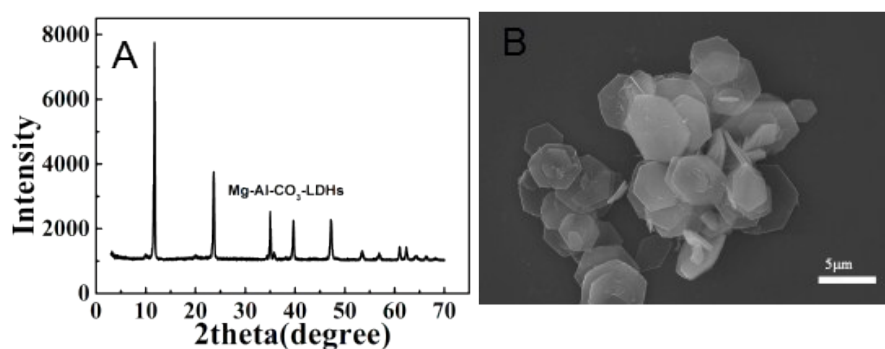

**Fig. S1** (A) The XRD pattern and (B) SEM image of MgAl-LDH

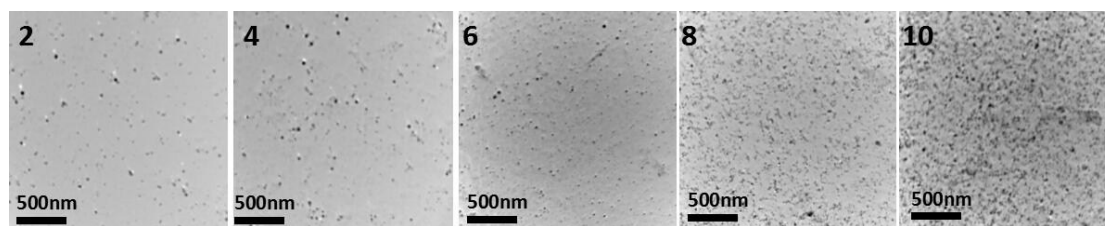

**Fig. S2** TEM of (CTA-AgNCs/LDH)<sub>n</sub> UTFs with different *n* (*n* varies from 2 to 10)

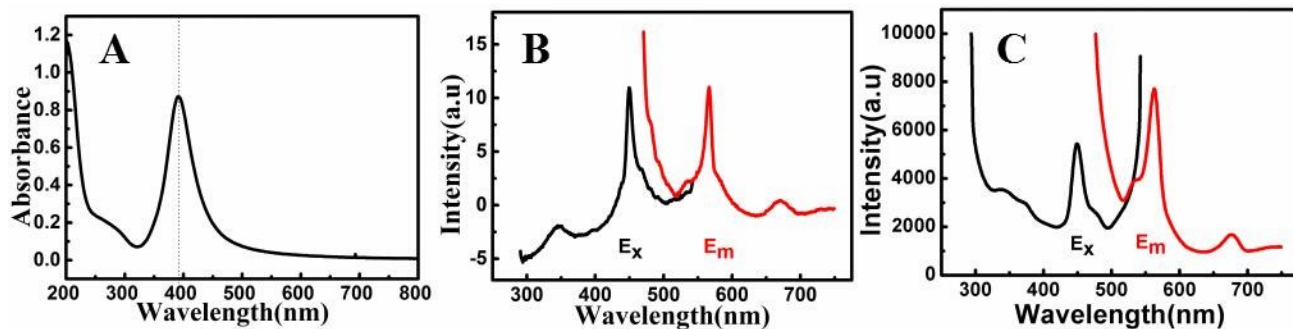

**Fig. S3** (A) UV-vis spectrum of SDS-AgNCs solutions, (B) excitation and emission spectra of SDS-AgNCs solutions and (C) excitation and emission spectra of (SDS-AgNCs/LDH) UTFs

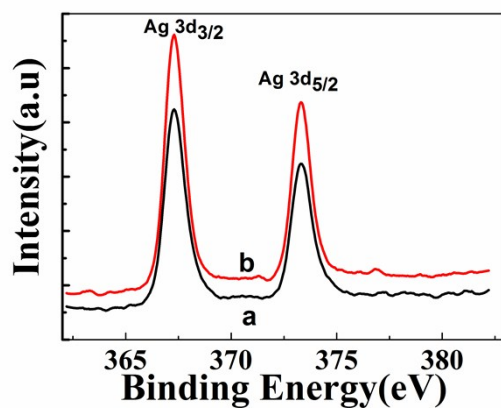

**Fig. S4** XPS spectrum of CTA-AgNCs solution (a) and CTA-AgNCs/LDH UTFs (b)

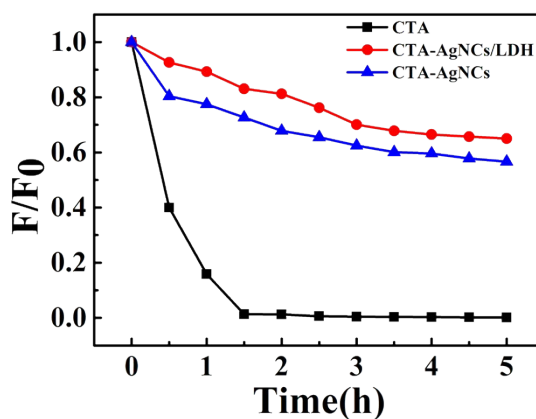

**Fig. S5** Fluorescence intensity changes of (CTA-AgNCs/LDH) UTFs, CTA-AgNCs and CTA solution after exposure of ultraviolet lamp.

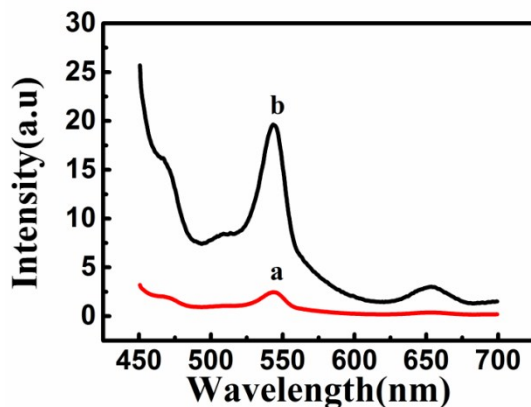

**Fig. S6** Fluorescence spectra of CTA-AgNCs solution (a) and CTA-AgNCs with addition of 1.0 $\mu$ M melamine (b).

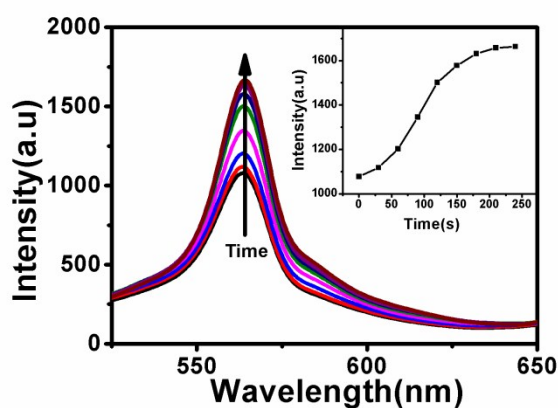

**Fig. S7** Fluorescence spectra of (CTA-AgNCs/LDH)<sub>10</sub> UTFs in the presence of 0.1 $\mu$ M melamine with different reaction time (t=0-240s ). The inset plot shows the fluorescence intensity at 565nm varying with the reaction time.

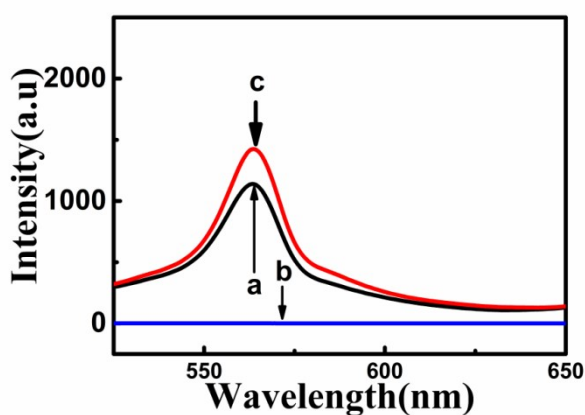

**Fig.S8** Fluorescence spectra of (CTA-AgNCs/LDH)<sub>10</sub> UTFs (a), (CTA-AgNCs/LDH)<sub>10</sub> with addition of different analytes mixture (b) and (CTA-AgNCs/LDH)<sub>10</sub> with addition of analytes mixture containing melamine (c)
